# Supplementary material for: Functional Annotation of Hierarchical Modularity
Source: PLoS One. 2012 Apr 4;7(4):e33744. doi: 10.1371/journal.pone.0033744 (PMC3319548; doi:10.1371/journal.pone.0033744)
Supplement: Supplement S1 — Results discussed in Functional coherency of protein functional modules and Functional coherency of protein pairs sections. (XLSX) [file pone.0033744.s001.xlsx]

## Sheet: MIPS-curated
Complex	ID	GS2	Size	HMS-pvalue
270.10	54	0.11	3	0.23
260.20.20	147	0	4	0.21
270.20.20	161	0	3	0.14
270.20.10	160	0	3	0.12
140.30.30.20	141	0.17	3	0.11
270.20.40	163	0	4	0.05
140.10.20	134	0	7	0.04
140.20.30	137	0	7	0.04
190.10	33	0.44	3	0.03
260.70	50	0	3	0.03
360.10	71	0.5	3	0.03
475.10	103	0.11	3	0.03
480.10	105	0	13	0.03
140.30.30.10	140	0.03	7	0.03
140.30.30.30	142	0	3	0.03
260.30.30.10	153	0	3	0.03
440.12.30	192	0	3	0.03
480.10.05	201	0	3	0.03
500.10.110	204	0.11	3	0.03
500.10.20	205	0.47	3	0.03
160	26	0	7	0.02
100	10	0	3	0.01
520.30	129	0	3	0.01
140.30.20	139	0.02	14	0.01
260.20.40	149	0	8	0.01
260.30.20	152	0	11	0.01
270.20.30	162	0	9	0.01
500.10.80	211	0.11	3	0.01
520.10.10	263	0	3	0.01
20	1	0	3	0
40	2	0.01	2	0
60	3	0	11	0
70	4	0.01	2	0
80	6	0.01	2	0
90.10	7	0	3	0
90.20	8	0.01	2	0
90.30	9	0.01	2	0
110	11	0.03	4	0
120.10	12	0.02	4	0
120.20	13	0	4	0
130	16	0	8	0
133.10	18	0	10	0
133.20	19	0.03	6	0
133.30	20	0.01	2	0
133.40	21	0.02	4	0
133.50	22	0.03	3	0
170	27	0.01	2	0
177	29	0	5	0
180.10	30	1	2	0
180.30	32	1	3	0
190.20	34	0.01	2	0
200	35	0	4	0
210	36	0.03	4	0
220	37	0	14	0
230.10	39	0.01	2	0
240.20	42	0	3	0
250	43	0.01	2	0
260.10	46	0.01	2	0
260.40	47	0.01	2	0
260.50	48	0.01	2	0
260.60	49	0	10	0
260.90	52	0.01	6	0
265	53	0.02	2	0
260.80	54	0.09	4	0
280	55	0.01	2	0
290.10	56	0	8	0
290.20	57	0.02	2	0
295	58	0.01	2	0
300	59	0	3	0
310	60	0	13	0
310.10	61	0	4	0
310.20	62	0.01	2	0
310.40	64	0	6	0
320	65	0	8	0
330	67	0	3	0
340	68	0.01	2	0
350.20	69	0.01	2	0
350.30	70	0.01	2	0
370	72	0.02	2	0
380	73	0.01	2	0
390	74	0	5	0
400	75	0	10	0
410.10	76	0	6	0
410.20	77	0	8	0
410.30	78	0	16	0
410.33	79	0	4	0
410.35	80	0	20	0
410.50	81	0.07	3	0
420.20	82	0	4	0
420.30	82	0	10	0
420.40	84	0	11	0
420.50	85	0	18	0
420.60	86	0	14	0
430	87	0	4	0
440.20	90	0.19	4	0
440.30	91	0.01	2	0
445.10	95	0.01	5	0
445.20	96	0.02	4	0
445.30	97	0.02	4	0
470	99	0.01	2	0
475.05	102	0	6	0
480	104	0.01	2	0
480.20	106	0	14	0
485	107	0.01	2	0
490	108	0.01	5	0
500.50	110	0.05	13	0
500.60	111	0.02	4	0
510.10	112	0	14	0
510.110	113	0	3	0
510.120	114	0	13	0
510.140	116	0.07	3	0
510.150	117	0.7	5	0
510.160	118	0.14	4	0
510.170	119	0.01	2	0
510.20	120	0.02	4	0
510.30	121	0.19	3	0
510.50	123	0.62	2	0
510.80	125	0.59	2	0
510.90	126	0.43	3	0
520.20	128	0	9	0
520.40	130	0	6	0
180.20	131	0.98	2	0
125.10.10	132	0.01	2	0
140.20.20	136	0	24	0
140.30.10	138	0	4	0
230.20.10	143	0.23	6	0
230.20.20	144	0.02	16	0
230.20.40	145	0.01	2	0
260.20.10	146	0	4	0
260.20.30	148	0	4	0
260.30.10	151	0	8	0
260.30.30.20	154	0.01	2	0
260.50.10	156	0	8	0
260.50.10.10	157	0.01	2	0
260.50.20	158	0	8	0
270.10.10	159	0.08	4	0
270.20.50	164	0.01	2	0
290.20.10	165	0	5	0
290.20.20	166	0.01	2	0
290.20.30	167	0.01	2	0
350.10.10	168	0.01	2	0
360.10.10	171	0	15	0
360.10.20	172	0	18	0
410.40.100	174	0	3	0
410.40.110	175	0.01	2	0
410.40.140	178	0.01	2	0
410.40.20	179	0	3	0
410.40.30	180	0	5	0
410.40.40	181	0.97	2	0
410.40.60	183	0	4	0
410.40.90	186	0	3	0
440.10.10	187	0	5	0
440.10.20	188	0	4	0
440.10.30	189	0	3	0
440.12.10	190	0	7	0
440.12.20	191	0	8	0
440.14.10	193	0	9	0
440.30.10.10	195	0	3	0
440.30.10.20	196	0.01	2	0
440.30.20	197	0	24	0
440.30.30	198	0.01	9	0
440.40.10	199	0.01	2	0
470.30.10	200	0	3	0
500.10.100	203	0.01	2	0
500.10.40	207	0	7	0
500.10.50	208	0.01	2	0
500.20.10	213	0.02	6	0
500.20.20	214	0.2	2	0
510.180.10.10	223	0	3	0
510.180.10.20	224	0.01	2	0
510.180.10.30	225	0	9	0
510.180.10.40	226	0.01	2	0
510.180.20	227	0	5	0
510.180.30.10	228	0.01	2	0
510.180.30.20	229	0.01	2	0
510.180.30.30	230	0	3	0
510.180.50.10	231	0	3	0
510.180.50.20	232	0.01	2	0
510.190.10	234	0.52	2	0
510.190.10.10	235	0.23	6	0
510.190.10.20.10	236	0.02	16	0
510.190.10.20.20	237	0.12	5	0
510.190.100	238	0.02	2	0
510.190.110	239	0	12	0
510.190.120	240	0.04	4	0
510.190.130	241	0.49	2	0
510.190.140	242	0.56	2	0
510.190.150	243	0.12	4	0
510.190.160.10	244	0	3	0
510.190.160.20	245	0.25	3	0
510.190.160.30	246	0.15	3	0
510.190.190	248	0.01	2	0
510.190.200	250	0.72	2	0
510.190.30	252	0.49	2	0
510.190.40	253	0	5	0
510.190.50	254	0.02	10	0
510.190.60	255	0.02	2	0
510.190.70	256	0.01	2	0
510.190.80	257	0	3	0
510.190.90	258	0.01	2	0
510.40.10	259	0	13	0
510.40.20	260	0	21	0
510.70.20	262	0	12	0
520.10.20	264	0	4	0
500.10.30	296	0	5	0
260.100	1140	0.01	2	0
510.100	1141	0	9	0
470.10	100(2)	0.02	6	0
470.20	101(2)	0	5	0
520.50	131(2)	0.01	2	0
440.40	92(2)	0	13	0
450	98(2)	0.05	6	0
440.30.10	194		36	0
500.60.10	221	0	44	0
500.60.20	222	0	31	0
500.40.10	218	0	81	0
500.40.20	219	0	57	0

## Sheet: MIPS - Ho
Code	ID	GS2	Size	HMS
550.2.10	499	0.69	2	0
550.2.11	510	0.01	2	0
550.2.110	511	0.88	2	0.3
550.2.12	521	0.9	2	0.09
550.2.122	524	0.82	2	0.4
550.2.124	526	0.98	2	0
550.2.131	534	0.01	2	0
550.2.136	539	0.64	2	0
550.2.144	548	0.01	2	0
550.2.148	552	0.01	2	0
550.2.159	564	0.49	2	0
550.2.162	568	0.55	2	0
550.2.167	573	0.64	2	0
550.2.177	584	0.01	2	0
550.2.178	585	0.55	2	0
550.2.18	587	0.52	2	0
550.2.184	592	0.53	2	0
550.2.189	597	0.19	2	0
550.2.19	598	0.6	2	0
550.2.192	601	0.01	2	0
550.2.193	602	0.01	2	0
550.2.197	606	0.01	2	0
550.2.199	608	0.98	2	0
550.2.20	610	0.73	2	0
550.2.211	623	0.62	2	0
550.2.213	625	0.02	2	0
550.2.217	629	0.02	2	0
550.2.218	630	0.79	2	0
550.2.219	631	0.59	2	0
550.2.225	638	0.08	2	0
550.2.226	639	0.02	2	0
550.2.230	644	0.02	2	0
550.2.231	645	0.24	2	0
550.2.235	649	0.87	2	0
550.2.236	650	0.73	2	0
550.2.24	654	0.01	2	0
550.2.245	660	0.01	2	0
550.2.247	662	0.49	2	0.3
550.2.249	664	0.54	2	0
550.2.263	680	0.53	2	0
550.2.268	685	0.02	2	0
550.2.273	691	0.6	2	0
550.2.276	694	0.01	2	0
550.2.277	695	0.53	2	0.01
550.2.280	699	0.01	2	0
550.2.282	701	0.78	2	0.01
550.2.287	706	0.01	2	0
550.2.291	711	0.7	2	0
550.2.293	713	0.53	2	0
550.2.3	720	0.06	2	0.03
550.2.30	721	0.82	2	0.3
550.2.306	728	0.79	2	0.45
550.2.307	729	0.49	2	0.09
550.2.309	731	0.01	2	0
550.2.324	748	0.25	2	0
550.2.325	749	0.01	2	0
550.2.331	756	0.53	2	0
550.2.335	760	0.45	2	0
550.2.339	764	0.61	2	0.01
550.2.342	768	0.01	2	0
550.2.349	775	0.61	2	0
550.2.358	785	0.73	2	0
550.2.359	786	0.89	2	0
550.2.361	789	0.01	2	0
550.2.366	794	0.49	2	0
550.2.38	809	0.51	2	0
550.2.387	817	0.73	2	0
550.2.393	824	0.02	2	0
550.2.395	826	0.22	2	0
550.2.399	830	0.21	2	0
550.2.407	840	0.67	2	0
550.2.408	841	0.01	2	0
550.2.414	848	0.49	2	0
550.2.422	857	0.15	2	0
550.2.428	863	0.48	2	0
550.2.431	867	0.62	2	0.18
550.2.432	868	0.51	2	0.45
550.2.433	869	0.01	2	0
550.2.436	872	0.01	2	0
550.2.44	876	0.01	2	0
550.2.443	880	0.02	2	0
550.2.452	890	0.51	2	0.03
550.2.456	894	0.74	2	0
550.2.471	911	0.49	2	0
550.2.483	924	0.64	2	0
550.2.488	929	0.59	2	0
550.2.492	934	0.7	2	0
550.2.494	936	0.01	2	0
550.2.496	938	0.97	2	0
550.2.499	941	0.07	2	0
550.2.502	946	0.6	2	0
550.2.503	947	0.55	2	0
550.2.51	954	0.54	2	0.03
550.2.516	961	0.01	2	0
550.2.522	968	0.67	2	0
550.2.526	972	0.01	2	0
550.2.527	973	0.52	2	0.01
550.2.53	976	0.54	2	0
550.2.531	978	0.06	2	0.09
550.2.537	984	0.98	2	0
550.2.539	986	0.02	2	0
550.2.54	987	0.56	2	0
550.2.542	990	0.69	2	0
550.2.55	998	0.49	2	0
550.2.57	1003	0.01	2	0
550.2.59	1005	0.01	2	0
550.2.65	1012	0.62	2	0.01
550.2.8	1028	0.48	2	0
550.2.80	1029	0.01	2	0
550.2.86	1035	0.61	2	0
550.2.107	507	0.04	3	0.01
550.2.121	523	0	3	0
550.2.127	529	0.43	3	0.09
550.2.139	542	0.71	3	0
550.2.140	544	0.11	3	0
550.2.145	549	0.69	3	0.03
550.2.149	553	0.35	3	0
550.2.15	554	0.53	3	0.01
550.2.170	577	0.62	3	0.01
550.2.175	582	0.31	3	0.12
550.2.179	586	0.71	3	0.16
550.2.185	593	0.48	3	0.06
550.2.188	596	0.66	3	0.32
550.2.190	599	0.13	3	0.01
550.2.191	600	0	3	0
550.2.195	604	0.11	3	0.11
550.2.196	605	0.75	3	0.14
550.2.2	609	0.63	3	0.62
550.2.202	613	0.14	3	0.06
550.2.208	619	0.25	3	0.14
550.2.21	621	0.72	3	0.16
550.2.220	633	0.48	3	0.35
550.2.222	635	0	3	0
550.2.229	642	0.43	3	0.16
550.2.242	657	0.68	3	0.03
550.2.248	663	0.1	3	0.18
550.2.251	667	0.15	3	0.09
550.2.252	668	0.68	3	0.3
550.2.255	671	0	3	0.01
550.2.262	679	0.78	3	0.24
550.2.266	683	0.19	3	0.12
550.2.269	686	0.11	3	0.11
550.2.285	704	0	3	0
550.2.286	705	0	3	0
550.2.299	719	0.1	3	0.11
550.2.303	725	0.69	3	0.1
550.2.311	734	0.25	3	0.03
550.2.317	740	0.41	3	0.12
550.2.32	743	0.36	3	0.44
550.2.330	755	0.69	3	0.46
550.2.343	769	0.57	3	0.7
550.2.354	781	0.5	3	0.26
550.2.373	802	0.78	3	0.47
550.2.384	814	0.41	3	0.47
550.2.390	821	0.35	3	0.12
550.2.391	822	0.35	3	0.18
550.2.397	828	0.57	3	0.14
550.2.40	832	0.15	3	0.03
550.2.409	842	0.11	3	0.03
550.2.411	845	0.16	3	0.08
550.2.419	853	0.66	3	0.17
550.2.425	860	0.5	3	0.12
550.2.430	866	0.5	3	0.12
550.2.448	885	0.69	3	0.03
550.2.450	888	0.32	3	0.11
550.2.457	895	0.2	3	0
550.2.461	900	0.17	3	0.03
550.2.462	901	0.78	3	0.64
550.2.465	904	0.26	3	0.01
550.2.472	912	0.69	3	0.2
550.2.478	918	0.52	3	0.16
550.2.482	923	0	3	0.01
550.2.484	925	0.47	3	0.25
550.2.487	928	0.82	3	0.32
550.2.490	932	0.15	3	0.15
550.2.498	940	0.48	3	0.12
550.2.509	953	0.69	3	0.05
550.2.510	955	0.72	3	0.03
550.2.514	959	0	3	0.03
550.2.519	964	0.11	3	0.05
550.2.529	975	0.82	3	0.29
550.2.530	977	0.47	3	0.32
550.2.533	980	0.12	3	0.03
550.2.547	995	0.11	3	0.01
550.2.551	1000	0.19	3	0.16
550.2.63	1010	0.81	3	0.43
550.2.7	1017	0.5	3	0.01
550.2.72	1020	0.52	3	0.16
550.2.73	1021	0.57	3	0.14
550.2.75	1023	0.47	3	0.14
550.2.97	1047	0.31	3	0.47
550.2.104	504	0.04	4	0
550.2.105	505	0.1	4	0.01
550.2.116	517	0.15	4	0.02
550.2.117	518	0.63	4	0.14
550.2.125	527	0.26	4	0
550.2.126	528	0.16	4	0
550.2.128	530	0.47	4	0.02
550.2.130	533	0.26	4	0.04
550.2.138	541	0.92	4	0.4
550.2.160	566	0.08	4	0
550.2.168	574	0.63	4	0.41
550.2.172	579	0	4	0.09
550.2.173	580	0.82	4	0.35
550.2.176	583	0.31	4	0.02
550.2.180	588	0.25	4	0
550.2.194	603	0.28	4	0.04
550.2.227	640	0.08	4	0.01
550.2.237	651	0.21	4	0.08
550.2.239	653	0.09	4	0.01
550.2.241	656	0.02	4	0
550.2.243	658	0.13	4	0.05
550.2.25	665	0.81	4	0.04
550.2.253	669	0.96	4	0.28
550.2.260	677	0.03	4	0.02
550.2.27	687	0.19	4	0.12
550.2.270	688	0.08	4	0
550.2.281	700	0.5	4	0.25
550.2.288	707	0.64	4	0
550.2.290	710	0.63	4	0.04
550.2.294	714	0.76	4	0.02
550.2.295	715	0.26	4	0.12
550.2.310	733	0.19	4	0.03
550.2.314	737	0	4	0
550.2.323	747	0.13	4	0
550.2.326	750	0.45	4	0.25
550.2.337	762	0.02	4	0.14
550.2.355	782	0.09	4	0
550.2.356	783	0.45	4	0.01
550.2.362	790	0.16	4	0.29
550.2.372	801	0.84	4	0.09
550.2.377	806	0.15	4	0.02
550.2.386	816	0.63	4	0
550.2.392	823	0.84	4	0.4
550.2.394	825	0.02	4	0.14
550.2.401	834	0.03	4	0
550.2.403	836	0.13	4	0
550.2.406	839	0.63	4	0.23
550.2.415	849	0.19	4	0
550.2.45	887	0.75	4	0.12
550.2.455	893	0.16	4	0.02
550.2.463	902	0.63	4	0.02
550.2.466	905	0.6	4	0.15
550.2.473	913	0.65	4	0.12
550.2.474	914	0.22	4	0.05
550.2.491	933	0.39	4	0.03
550.2.5	942	0.64	4	0.23
550.2.50	943	0.35	4	0.04
550.2.512	957	0.18	4	0.09
550.2.513	958	0.65	4	0
550.2.515	960	0.1	4	0
550.2.518	963	0.45	4	0
550.2.536	983	0.18	4	0.2
550.2.550	999	0.83	4	0.06
550.2.60	1007	0.34	4	0.14
550.2.61	1008	0.5	4	0.09
550.2.66	1013	0.08	4	0
550.2.67	1014	0.46	4	0.17
550.2.76	1024	0.45	4	0.02
550.2.81	1030	0.09	4	0
550.2.83	1032	0.79	4	0.17
550.2.85	1034	0.17	4	0.02
550.2.100	500	0.33	5	0
550.2.102	502	0.34	5	0
550.2.129	531	0.08	5	0
550.2.135	538	0.29	5	0.01
550.2.16	565	0.75	5	0.19
550.2.164	570	0.5	5	0.01
550.2.186	594	0.3	5	0.09
550.2.198	607	0.5	5	0.01
550.2.209	620	0.01	5	0
550.2.210	622	0.3	5	0.22
550.2.212	624	0.92	5	0.62
550.2.250	666	0.3	5	0.03
550.2.259	675	0	5	0
550.2.264	681	0.01	5	0.03
550.2.292	712	0.3	5	0.13
550.2.321	745	0.53	5	0.16
550.2.333	758	0.75	5	0.29
550.2.345	771	0.11	5	0.09
550.2.351	778	0.18	5	0
550.2.36	787	0.31	5	0.09
550.2.365	793	0.34	5	0.03
550.2.368	796	0.7	5	0
550.2.371	800	0.7	5	0.2
550.2.396	827	0.2	5	0.04
550.2.398	829	0.08	5	0
550.2.417	851	0.11	5	0
550.2.421	856	0.7	5	0.01
550.2.434	870	0.12	5	0
550.2.441	878	0.01	5	0.01
550.2.453	891	0.7	5	0.2
550.2.489	930	0.43	5	0
550.2.506	950	0.52	5	0
550.2.528	974	0.53	5	0.22
550.2.540	988	0.12	5	0.09
550.2.541	989	0.67	5	0.3
550.2.546	994	0.01	5	0
550.2.70	1018	0.33	5	0.2
550.2.71	1019	0.33	5	0.11
550.2.93	1043	0.42	5	0
550.2.108	508	0.01	6	0
550.2.114	515	0.03	6	0
550.2.118	519	0.82	6	0.07
550.2.157	562	0.24	6	0.18
550.2.158	563	0.86	6	0.42
550.2.171	578	0.01	6	0.02
550.2.183	591	0.23	6	0
550.2.214	626	0.03	6	0
550.2.228	641	0.31	6	0.2
550.2.256	672	0.23	6	0
550.2.305	727	0.67	6	0.05
550.2.312	735	0.27	6	0.03
550.2.352	779	0.27	6	0
550.2.405	838	0.96	6	0.07
550.2.41	843	0.44	6	0.11
550.2.410	844	0.06	6	0
550.2.420	855	0.2	6	0
550.2.423	858	0.21	6	0.02
550.2.43	865	0.3	6	0.02
550.2.442	879	0.3	6	0.05
550.2.445	882	0.81	6	0.13
550.2.467	906	0.21	6	0.44
550.2.501	945	0.6	6	0.66
550.2.508	952	0.43	6	0.82
550.2.521	967	0.02	6	0.53
550.2.544	992	0.43	6	0.13
550.2.549	997	0.4	6	0.06
550.2.1	498	0.66	7	0.23
550.2.14	543	0	7	0
550.2.142	546	0.36	7	0.35
550.2.174	581	0.56	7	0.1
550.2.203	614	0.66	7	0.08
550.2.206	617	0.2	7	0.04
550.2.216	628	0.76	7	0.05
550.2.223	636	0	7	0.02
550.2.224	637	0.56	7	0.19
550.2.275	693	0.27	7	0.02
550.2.28	698	0.29	7	0.01
550.2.297	717	0.06	7	0.04
550.2.298	718	0.14	7	0.06
550.2.300	722	0.16	7	0.05
550.2.301	723	0.06	7	0.03
550.2.315	738	0	7	0
550.2.329	753	0.78	7	0.04
550.2.33	754	0	7	0.1
550.2.332	757	0.58	7	0.04
550.2.340	766	0.19	7	0.01
550.2.357	784	0	7	0
550.2.381	811	0.58	7	0.14
550.2.383	813	0.16	7	0.07
550.2.413	847	0.04	7	0
550.2.418	852	0.16	7	0.02
550.2.449	886	0.21	7	0.34
550.2.486	927	0.71	7	0.12
550.2.52	965	0.16	7	0
550.2.525	971	0.42	7	0.34
550.2.545	993	0.34	7	0.02
550.2.552	1001	0.25	7	0.47
550.2.64	1011	0.72	7	0.19
550.2.99	1049	0.77	7	0.13
550.2.120	522	0.11	8	0
550.2.141	545	0.89	8	0
550.2.215	627	0.09	8	0
550.2.234	648	0.33	8	0.06
550.2.265	682	0.01	8	0.01
550.2.274	692	0.33	8	0.01
550.2.289	708	0.37	8	0
550.2.322	746	0.01	8	0.01
550.2.347	773	0.52	8	0.11
550.2.348	774	0.23	8	0.01
550.2.363	791	0.14	8	0.03
550.2.364	792	0.22	8	0.01
550.2.370	799	0.01	8	0.02
550.2.382	812	0.51	8	0
550.2.385	815	0.14	8	0.06
550.2.39	820	0.04	8	0.02
550.2.400	833	0.15	8	0
550.2.42	854	0.03	8	0.01
550.2.426	861	0.52	8	0.61
550.2.427	862	0.01	8	0
550.2.429	864	0.22	8	0.01
550.2.444	881	0.14	8	0
550.2.447	884	0.32	8	0.43
550.2.451	889	0.51	8	0.02
550.2.454	892	0.27	8	0.01
550.2.78	1026	0.51	8	0.01
550.2.84	1033	0.42	8	0.12
550.2.87	1036	0.46	8	0.22
550.2.106	506	0.2	9	0
550.2.112	513	0.42	9	0
550.2.143	547	0.31	9	0.01
550.2.153	558	0.12	9	0
550.2.154	559	0.47	9	0.13
550.2.232	646	0.3	9	0.01
550.2.254	670	0.03	9	0
550.2.261	678	0.42	9	0.01
550.2.278	696	0.21	9	0.03
550.2.302	724	0.01	9	0.02
550.2.304	726	0.46	9	0.23
550.2.31	732	0.05	9	0
550.2.319	742	0.39	9	0.02
550.2.344	770	0.01	9	0
550.2.346	772	0.59	9	0.27
550.2.367	795	0.21	9	0.05
550.2.404	837	0.42	9	0
550.2.47	909	0.25	9	0
550.2.74	1022	0.66	9	0.02
550.2.89	1038	0.13	9	0.12
550.2.151	556	0.79	10	0.04
550.2.155	560	0.04	10	0.13
550.2.163	569	0	10	0
550.2.165	571	0.02	10	0
550.2.181	589	0.07	10	0
550.2.207	618	0.31	10	0.14
550.2.258	674	0.31	10	0.05
550.2.26	676	0.27	10	0.2
550.2.271	689	0.04	10	0.04
550.2.296	716	0.05	10	0.23
550.2.313	736	0.29	10	0.07
550.2.328	752	0.29	10	0.1
550.2.34	765	0.23	10	0.16
550.2.402	835	0.84	10	0.05
550.2.459	897	0.65	10	0.04
550.2.46	898	0.02	10	0.22
550.2.469	908	0.64	10	0.27
550.2.48	920	0	10	0
550.2.480	921	0	10	0
550.2.485	926	0.29	10	0
550.2.532	979	0.02	10	0
550.2.548	996	0.19	10	0
550.2.58	1004	0.04	10	0.04
550.2.68	1015	0.91	10	0.12
550.2.77	1025	0.19	10	0.06
550.2.88	1037	0.23	10	0.12
550.2.9	1039	0.36	10	0.01
550.2.113	514	0	11	0
550.2.187	595	0.13	11	0.16
550.2.279	697	0.52	11	0
550.2.284	703	0.66	11	0.14
550.2.318	741	0.03	11	0
550.2.389	819	0.53	11	0.14
550.2.412	846	0.86	11	0.05
550.2.437	873	0.22	11	0
550.2.511	956	0.54	11	0.7
550.2.69	1016	0.08	11	0.21
550.2.201	612	0.6	12	0.02
550.2.350	777	0.29	12	0.02
550.2.424	859	0.11	12	0.02
550.2.90	1040	0.35	12	0.14
550.2.119	520	0.86	13	0.02
550.2.147	551	0.96	13	0.06
550.2.156	561	0.54	13	0.15
550.2.17	576	0.33	13	0.17
550.2.221	634	0.67	13	0.13
550.2.233	647	0.48	13	0
550.2.272	690	0.58	13	0.03
550.2.29	709	0.81	13	0.3
550.2.327	751	0.36	13	0.02
550.2.378	807	0.63	13	0.02
550.2.380	810	0	13	0
550.2.439	875	0.29	13	0.03
550.2.534	981	0.43	13	0
550.2.137	540	0.12	14	0
550.2.161	567	0.01	14	0
550.2.169	575	0.03	14	0
550.2.238	652	0	14	0
550.2.240	655	0.61	14	0.05
550.2.336	761	0.28	14	0
550.2.35	776	0.63	14	0
550.2.79	1027	0.31	14	0.05
550.2.182	590	0.75	15	0.1
550.2.204	615	0	15	0
550.2.458	896	0.33	15	0
550.2.497	939	0.73	15	0.01
550.2.535	982	0.67	15	0.21
550.2.96	1046	0.02	15	0
550.2.103	503	0.6	16	0
550.2.109	509	1	16	0.01
550.2.133	536	0.26	16	0
550.2.475	915	0	16	0
550.2.49	931	0.97	16	0
550.2.95	1045	0.44	16	0
550.2.205	616	0.01	17	0
550.2.257	673	0.7	17	0
550.2.369	797	0.31	17	0.02
550.2.37	798	0.23	17	0
550.2.374	803	0.89	17	0.02
550.2.283	702	0.76	18	0
550.2.334	759	0.1	18	0
550.2.468	907	0	19	0
550.2.6	1006	0.39	19	0
550.2.267	684	0.36	20	0.04
550.2.111	512	0.99	21	0
550.2.150	555	0.11	22	0
550.2.308	730	0.86	22	0.03
550.2.353	780	0.2	22	0.04
550.2.375	804	0.24	22	0
550.2.101	501	0.06	23	0
550.2.517	962	0.06	23	0.13
550.2.13	532	0.82	24	0
550.2.493	935	0	24	0
550.2.62	1009	0.75	25	0
550.2.200	611	0.25	26	0
550.2.23	643	0.44	26	0
550.2.505	949	0.17	26	0
550.2.91	1041	0.09	26	0
550.2.320	744	0	27	0
550.2.360	788	0.04	27	0
550.2.379	808		27	0

## Sheet: MIPS - Gavin
Code	Internal ID	Internal ID	GS-2	Size	HMS
550.1.10	267	267	0.01	20	0
550.1.101	269	269	0.03	10	0
550.1.103	271	271	0.54	13	0
550.1.107	275	275	0.09	26	0
550.1.113	282	282	0.02	2	0
550.1.114	283	283	0.5	4	0
550.1.115	284	284	0.76	6	0
550.1.117	286	286	0	3	0
550.1.12	289	289	0.02	2	0
550.1.122	292	292	0.85	3	0
550.1.124	294	294	0.27	16	0
550.1.125	295			73	0
550.1.127	297	297	0.35	6	0
550.1.128	298	298	0.44	3	0
550.1.130	301	301	0.24	5	0
550.1.135	306	306	0.38	19	0
550.1.136	307	307	0.32	10	0
550.1.137	308	308	0.71	3	0
550.1.142	314	314	0.25	25	0
550.1.143	315	315	0	25	0
550.1.144	316			83	0
550.1.151	324	324	0.47	3	0
550.1.154	327	327	0	8	0
550.1.155	328	328	0.05	17	0
550.1.156	329	329	0.02	2	0
550.1.157	330	330	0.17	3	0
550.1.159	332	332	1	2	0
550.1.16	333	333	0.41	2	0
550.1.160	334	334	0.11	3	0
550.1.163	337	337	0.45	2	0
550.1.167	341	341	0.27	4	0
550.1.172	347	347	0.01	2	0
550.1.174	349	349	0.59	2	0
550.1.178	353	353	0.95	7	0
550.1.181	357	357	0.08	5	0
550.1.182	358	358	0.62	2	0
550.1.185	361	361	0.61	2	0
550.1.186	362	362	0.09	2	0
550.1.187	363	363	0.01	2	0
550.1.189	365	365	0.26	21	0
550.1.19	366	366	0.4	12	0
550.1.190	367	367	0	4	0
550.1.191	368	368	0	12	0
550.1.192	369	369	0.82	19	0
550.1.194	371	371	0.28	9	0
550.1.195	372	372	0.21	23	0
550.1.196	373	373	0.62	15	0
550.1.198	375	375	0.18	20	0
550.1.199	376	376	0	9	0
550.1.2	377	377	0.53	2	0
550.1.20	378	378	0.34	2	0
550.1.200	379	379	0.08	28	0
550.1.201	380	380	0.08	12	0
550.1.202	381			29	0
550.1.203	382	382	0.22	23	0
550.1.205	384	384	0	13	0
550.1.206	385	385	0.24	13	0
550.1.207	386	386	0.25	28	0
550.1.210	390	390	0	18	0
550.1.211	391	391	0.36	26	0
550.1.213	393			29	0
550.1.215	395	395	0.02	4	0
550.1.216	396	396	0	5	0
550.1.218	398	398	0	3	0
550.1.219	399	399	0.02	2	0
550.1.22	400	400	0.01	2	0
550.1.220	401	401	0.29	18	0
550.1.223	404	404	0.01	2	0
550.1.226	407	407	0.17	6	0
550.1.228	409	409	0	10	0
550.1.229	410	410	0.36	8	0
550.1.231	413	413	0.75	13	0
550.1.24	415	415	0.01	2	0
550.1.26	417	417	0.01	2	0
550.1.28	419	419	0.11	2	0
550.1.3	421	421	0	7	0
550.1.34	426	426	0.39	12	0
550.1.36	428	428	0.11	5	0
550.1.38	430	430	0.02	2	0
550.1.39	431	431	0.38	8	0
550.1.44	437	437	0.05	9	0
550.1.45	438	438	0	11	0
550.1.46	439	439	0.01	2	0
550.1.54	448	448	0.24	5	0
550.1.56	450	450	0.35	2	0
550.1.57	451	451	0.01	2	0
550.1.61	456	456	0.01	2	0
550.1.64	459	459	0.49	2	0
550.1.66	461	461	0.01	2	0
550.1.70	466	466	0.94	20	0
550.1.71	467	467	0	7	0
550.1.73	469	469	0.03	4	0
550.1.74	470	470	0	4	0
550.1.76	472	472	0.01	2	0
550.1.87	484	484	0	6	0
550.1.9	487	487	0.36	13	0
550.1.90	488	488	0.01	2	0
550.1.94	492	492	0.01	2	0
550.1.95	493	493	0.46	4	0
550.1.97	495	495	0.61	2	0
550.1.121	291	291	0.87	2	0
550.1.126	296	296	0	3	0
550.1.141	313	313	0	20	0
550.1.15	322	322	0.7	2	0
550.1.133	304	304	0.65	4	0.01
550.1.161	335	335	0.28	7	0.01
550.1.171	346	346	0.46	8	0.01
550.1.180	356	356	0.59	2	0.01
550.1.217	397	397	0.31	3	0.01
550.1.222	403	403	0.77	3	0.01
550.1.30	422	422	0.07	3	0.01
550.1.77	473	473	0.04	10	0.01
550.1.86	483	483	0.4	12	0.01
550.1.99	497	497	0.4	8	0.01
550.1.162	336	336	0.01	2	0.02
550.1.170	345			44	0.02
550.1.18	355	355	0.01	16	0.02
550.1.197	374	374	0.47	22	0.02
550.1.47	440	440	0	4	0.02
550.1.7	465	465	0.02	10	0.02
550.1.75	471	471	0	13	0.02
550.1.8	476	476	0.34	12	0.02
550.1.88	485	485	0.14	4	0.02
550.1.131	302	302	0.44	3	0.03
550.1.158	331	331	0.02	2	0.03
550.1.164	338	338	0.71	3	0.03
550.1.169	343	343	0.54	8	0.03
550.1.175	350	350	0.11	3	0.03
550.1.193	370	370	0.78	7	0.03
550.1.221	402	402	0	7	0.03
550.1.27	418	418	0.19	3	0.03
550.1.52	446	446	0.47	6	0.03
550.1.69	464	464	0.75	13	0.03
550.1.81	478	478	0	7	0.03
550.1.84	481	481	0	7	0.03
550.1.85	482	482	0.42	8	0.03
550.1.91	489	489	0.19	3	0.03
550.1.140	312			46	0.04
550.1.168	342	342	1	3	0.04
550.1.176	351	351	0.33	8	0.04
550.1.72	468	468	0.36	7	0.04
550.1.79	475	475	0.25	15	0.04
550.1.14	311	311	0.4	6	0.04
550.1.188	364	364	0.43	3	0.05
550.1.23	411	411	0.53	9	0.05
550.1.29	420	420	0.64	14	0.05
550.1.78	474	474	0	10	0.05
550.1.153	326	326	0.01	2	0.06
550.1.35	427	427	0.35	6	0.07
550.1.68	463	463	0.49	7	0.07
550.1.1	266	266	0.61	15	0.08
550.1.106	274	274	0.5	11	0.08
550.1.173	348	348	0.14	3	0.08
550.1.230	412	412	0.65	10	0.08
550.1.4	432	432	0	5	0.08
550.1.42	435	435	0.4	13	0.08
550.1.6	454	454	0.13	9	0.08
550.1.11	278	278	0.34	5	0.09
550.1.58	452	452	0.21	3	0.11
550.1.92	490	490	0.39	3	0.12
550.1.123	293	293	0.83	20	0.14
550.1.13	300	300	0.04	2	0.14
550.1.132	303	303	0.2	3	0.14
550.1.224	405	405	0.42	9	0.14
550.1.119	288	288	0.84	10	0.15
550.1.138	309			35	0.16
550.1.227	408	408	0.5	3	0.16
550.1.25	416	416	0.79	3	0.16
550.1.53	447	447	0.78	7	0.16
550.1.89	486	486	0.47	3	0.16
550.1.5	443	443	0.15	4	0.17
550.1.59	453	453	0.75	3	0.18
550.1.60	455	455	0.71	2	0.18
550.1.80	477	477	0.24	5	0.19
550.1.62	457	457	0.47	3	0.2
550.1.118	287	287	0.96	4	0.21
550.1.100	268	268	0.79	2	0.22
550.1.17	344	344	0.31	15	0.22
550.1.33	425	425	0.69	2	0.22
550.1.134	305	305	0.06	24	0.23
550.1.166	340	340	0.01	10	0.23
550.1.49	442	442	0.82	2	0.23
550.1.93	491	491	0.49	2	0.23
550.1.55	449	449	0.29	5	0.24
550.1.40	433	433	0.3	4	0.25
550.1.183	359	359	0.78	3	0.26
550.1.32	424	424	0.25	3	0.26
550.1.51	445	445	0.47	3	0.29
550.1.82	479	479	0.93	4	0.29
550.1.112	281	281	0.59	2	0.3
550.1.48	441	441	0.6	2	0.3
550.1.152	325	325	0.15	4	0.32
550.1.67	462	462	0.19	4	0.34
550.1.129	299	299	0.74	3	0.38
550.1.150	323	323	0.02	4	0.4
550.1.225	406	406	0.86	2	0.43
550.1.65	460	460	0.71	3	0.43
550.1.96	494	494	0.64	10	0.44
550.1.232	414	414	0.87	2	0.45
550.1.83	480	480	0.9	2	0.45
550.1.116	285	285	0.76	4	0.64
550.1.165	339	339	0.83	3	0.67
550.1.43	436	436	0.3	2	1
550.1.50	444	444	0.68	2	1
550.1.63	458	458	0.95	2	1

## Sheet: MIPS - Krogen
Code	ID	GS2	Size	HMS
550.3.80	1128	0.57	3	0.03
550.3.10	1051	0.11	3	0.03
550.3.41	1085	0.88	6	0.02
550.3.28	1070	0	3	0.1
550.3.18	1059	0.79	2	0
550.3.54	1099	0.19	2	0.09
550.3.64	1110	0.35	3	0.1
550.3.12	1053	0	7	0.03
550.3.48	1092	0.36	5	0.01
550.3.26	1068	0.69	3	0.03
550.3.38	1081	0.24	6	0.02
550.3.7	1116	0.13	10	0.02
550.3.51	1096	0.01	9	0.01
550.3.57	1102	0.11	3	0.01
550.3.1	1050	0.02	4	0
550.3.11	1052	0.09	4	0
550.3.13	1054	0	3	0
550.3.14	1055	0.01	15	0
550.3.15	1056	0.01	9	0
550.3.16	1057	0.01	11	0
550.3.17	1058	0.03	9	0
550.3.19	1060	0.3	9	0
550.3.20	1062	0.2	2	0
550.3.21	1063	0.01	2	0
550.3.22	1064	0	14	0
550.3.23	1065	0	14	0
550.3.24	1066	0	17	0
550.3.25	1067	0	12	0
550.3.27	1069	0.07	3	0
550.3.30	1073	0.11	3	0
550.3.31	1074	0.21	5	0
550.3.32	1075	0	14	0
550.3.33	1076	0	8	0
550.3.34	1077	0.55	5	0
550.3.35	1078	0	9	0
550.3.37	1080	0.01	2	0
550.3.39	1082	0.01	2	0
550.3.4	1083	0.41	5	0
550.3.40	1084	0.45	4	0
550.3.42	1086	0.01	2	0
550.3.43	1087	0	10	0
550.3.46	1090	0.08	11	0
550.3.47	1091	0.12	9	0
550.3.49	1093	0.07	3	0
550.3.5	1094	0	12	0
550.3.50	1095	0	17	0
550.3.52	1097	0.05	9	0
550.3.53	1098	0.35	13	0
550.3.55	1100	0.02	4	0
550.3.56	1101	0	10	0
550.3.6	1105	0	5	0
550.3.60	1106	0	13	0
550.3.65	1111	0	3	0
550.3.67	1113	0	3	0
550.3.69	1115	0.53	2	0
550.3.76	1123	0.01	2	0
550.3.78	1125	0	4	0
550.3.82	1130	0.02	2	0
550.3.83	1131	0.51	2	0
550.3.87	1135	0	6	0
550.3.9	1138	0	4	0
550.3.91	1140	0.01	2	0

## Sheet: KEGG
Kegg	Pathway	Internal ID	GS2	Size	HMS
10	Glycolysis / Gluconeogenesis	34	0	14	0
20	Citrate cycle (TCA cycle)	36	0	26	0
30	Pentose phosphate pathway	26	0	26	0
40	Pentose and glucuronate interconversions	39	0	11	0
51	Fructose and mannose metabolism	40	0.01	5	0
52	Galactose metabolism	42	0.01	17	0
61	Fatty acid biosynthesis	51	0	7	0
71	Fatty acid metabolism	53	0	18	0
72	Synthesis and degradation of ketone bodies	54	0	15	0
100	Biosynthesis of steroids	55	0.02	25	0
120	Oxidative phosphorylation	47	0.03	5	0
130	Purine metabolism	66	0	3	0
190	Pyrimidine metabolism	23	0	20	0
220	Glycine, serine and threonine metabolism	7	0	13	0
230	Valine, leucine and isoleucine degradation	30	0	26	0
240	Valine, leucine and isoleucine biosynthesis	67	0	24	0
251	Lysine biosynthesis	68	0	14	0
252	Lysine degradation	69	0	15	0
260	Arginine and proline metabolism	9	0.01	8	0
271	Histidine metabolism	14	0.01	5	0
272	Tyrosine metabolism	24	0.04	9	0
280	Phenylalanine metabolism	70	0	7	0
290	Tryptophan metabolism	12	0	17	0
300	Phenylalanine, tyrosine and tryptophan biosynthesis	29	0	28	0
310	beta-Alanine metabolism	11	0	15	0
330	Taurine and hypotaurine metabolism	15	0.04	11	0
340	Selenoamino acid metabolism	2	0	19	0
350	Cyanoamino acid metabolism	1	0	9	0
360	Glutathione metabolism	10	0.02	16	0
361	Starch and sucrose metabolism	43	0.01	2	0
362	N-Glycan biosynthesis	71	0.01	5	0
380	High-mannose type N-glycan biosynthesis	72	0.02	6	0
400	Glycerolipid metabolism	56	0.01	6	0
401	Inositol phosphate metabolism	46	0	22	0
410	Glycosylphosphatidylinositol(GPI)-anchor biosynthesis	75	0.01	9	0
430	Glycerophospholipid metabolism	58	0	12	0
440	Ether lipid metabolism	60	0	21	0
450	Arachidonic acid metabolism	63	0.01	8	0
460	alpha-Linolenic acid metabolism	64	0	10	0
480	Sphingolipid metabolism	62	0.08	12	0
500	Pyruvate metabolism	44	0	21	0
510	Glyoxylate and dicarboxylate metabolism	45	0.05	21	0
513	Propanoate metabolism	17	0	24	0
520	Butanoate metabolism	22	0	25	0
521	Methane metabolism	48	0	13	0
530	Thiamine metabolism	16	0	7	0
561	Riboflavin metabolism	79		23	0
562	Vitamin B6 metabolism	80	0.01	27	0
563	Nicotinate and nicotinamide metabolism	19	0	18	0
564	Pantothenate and CoA biosynthesis	81	0	16	0
565	Biotin metabolism	82	0	29	0
590	Lipoic acid metabolism	83	0	22	0
592	Folate biosynthesis			6	0
600	Limonene and pinene degradation	5		42	0
620	Nitrogen metabolism	13	0.02	2	0
624	Sulfur metabolism	50	0.01	2	0
630	Polyunsaturated fatty acid biosynthesis	65	0.11	7	0
632	One carbon pool by folate	8	0.02	11	0.01
640	Porphyrin and chlorophyll metabolism	28	0	7	0.01
641	Ubiquinone biosynthesis	38	0	7	0.04
650	Terpenoid biosynthesis	49	0.09	5	0.09
660	Ribosome	18		70
670	RNA polymerase	25		43
680	Basal transcription factors	57		31
710	DNA polymerase	78		32
720	Proteasome	52		86
730	Protein export	31		50
740	MAPK signaling pathway	37		71
750	Phosphatidylinositol signaling system	76		109
760	Cell cycle - yeast	33		32
770	Ubiquitin mediated proteolysis	73		147
780	SNARE interactions in vesicular transport	77		55
785	Regulation of autophagy	74		29

## Sheet: Chen
Code	Module ID	Size	HMS	GS2
6	M6	5	0.97	0.03
47	M47	5	0.22	0.7
77	M77	5	0.03	0
94	M94	5	0	0.01
103	M103	5	0	0
125	M125	5	0	0
131	M131	5	0.01	0.02
189	M189	5	0.13	0.03
190	M190	5	0	0
16	M16	6	0	0.01
100	M100	6	0	0
143	M143	6	0	0.03
171	M171	6	0	0
176	M176	6	0.02	0
177	M177	6	0	0
7	M7	7	0	0
34	M34	7	0	0
93	M93	7	0	0
111	M111	7	0	0.01
138	M138	7	0	0.19
141	M141	7	0.07	0.34
262	M262	7	0	0.39
5	M5	8	0.89	0.08
18	M18	8	0	0.01
19	M19	8	0.1	0.43
39	M39	8	0.01	0.01
51	M51	8	0.45	0.85
116	M116	8	0	0
118	M118	8	0.2	0.4
168	M168	8	0	0.01
173	M173	8	0.12	0.01
174	M174	8	0.02	0
234	M234	8	0	0.77
248	M248	8	0	0
255	M255	8	0	0
263	M263	8	0.93	1
17	M17	9	0	0
113	M113	9	0.35	0.2
134	M134	9	0	0.02
135	M135	9	0.13	0.12
136	M136	9	0.62	0.96
139	M139	9	0	0.03
223	M223	9	0.05	0
120	M120	10	0.02	0.11
147	M147	10	0	0
161	M161	10	0.1	0.76
170	M170	10	0.05	0
175	M175	10	0	0
187	M187	10	0.43	0.63
199	M199	10	0.03	0.51
224	M224	10	0	0
250	M250	10	0.05	0.04
12	M12	11	0	0
50	M50	11	0	0.02
54	M54	11	0.46	0.14
62	M62	11	0.16	0.08
91	M91	11	0	0
194	M194	11	0.01	0.04
201	M201	11	0.64	0.04
226	M226	11	0.52	0.85
27	M27	12	0.01	0
57	M57	12	0	0.14
123	M123	12	0	0
150	M150	12	0.02	0.88
209	M209	12	0	0
253	M253	12	0.46	0.61
256	M256	12	0	0
23	M23	13	0.86	0.26
129	M129	13	0.41	0.96
133	M133	13	0.16	0.26
232	M232	13	0.28	0.96
257	M257	13	0.31	0.34
2	M2	14	0	0
4	M4	14	0	0
65	M65	14	0	0.01
67	M67	14	0	0
75	M75	14	0	0
79	M79	14	0.06	0.27
221	M221	14	0.06	0.49
238	M238	14	0	0.98
258	M258	14	0.31	0.08
33	M33	15		0.52
38	M38	15	0.05	0
45	M45	15	0	0.09
157	M157	15	0.41	0.1
191	M191	15	0.38	0.78
212	M212	15	0	0.14
251	M251	15	0.01	0.31
252	M252	15	0.07	0.1
31	M31	16	0	0
40	M40	16	0	0.07
49	M49	16	0	0
121	M121	16	0.9	0.03
124	M124	16	0.83	0.04
155	M155	16	0.1	0.97
202	M202	16	0.01	0.37
203	M203	16	0.21	0.01
205	M205	16	0	0
219	M219	16	0.25	0.85
246	M246	16	0	0.84
8	M8	17	0.39	0.85
89	M89	17	0.4	0.92
107	M107	17	0	0.1
110	M110	17	0.62	0.02
119	M119	17	0.15	0.65
158	M158	17	0.62	0.25
213	M213	17	0.41	0.3
10	M10	18	0.28	0
102	M102	18	0.28	0.35
231	M231	18	0.05	1
235	M235	18		0
240	M240	18	0	0
37	M37	19	0.07	0.93
85	M85	19	0	0.38
112	M112	19	0.52	0.06
142	M142	19	0	0
172	M172	19	0	0
264	M264	19	0	0
44	M44	20	0.96	0.01
86	M86	20	0	0.2
206	M206	20	0	0.06
227	M227	20	0.01	0.43
241	M241	20	0	1
21	M21	21	0.01	0.9
72	M72	21	0.04	0.5
1	M1	22	0.24	0.79
30	M30	22	0.33	0.78
76	M76	22	0	0.24
78	M78	22	0.01	0.94
146	M146	22	0.02	0
207	M207	22	0.05	0.04
214	M214	22	0.88	0.13
259	M259	22	0.01	0.98
29	M29	23	0.32	0.77
84	M84	23	0.04	0.95
117	M117	23	0.02	0.72
144	M144	23	0.78	0.06
148	M148	23	0.01	0.07
164	M164	23	0.01	0.26
200	M200	23	0.65	0.14
225	M225	23	0.02	0
230	M230	23	0	0
239	M239	23	0	0.43
42	M42	24	0.05	0.45
87	M87	24	0	0.18
115	M115	24	0.02	0.82
152	M152	24	0	0.85
245	M245	24	0.06	0.63
66	M66	25	0	0.04
46	M46	26		0.1
193	M193	26	0	0

## Sheet: CYS-2008
ID	Size	HMS
5	2	0
12	2	0
15	2	0
16	2	0
17	2	0
18	2	0
21	2	0
23	2	0
24	2	0
26	2	0
33	2	0
38	2	0
40	2	0
42	2	0
44	2	0
46	2	0
49	2	0
50	2	0
51	2	0
52	2	0
53	2	0
56	2	0
59	2	0
62	2	0
64	2	0
68	2	0
69	2	0
72	2	0
76	2	0
78	2	0
79	2	0
83	2	0.01
87	2	0
94	2	0
98	2	0
100	2	0
101	2	0
102	2	0
105	2	0
106	2	0
112	2	0
115	2	0
118	2	0
122	2	0
124	2	0
127	2	0
128	2	0
130	2	0
131	2	0
132	2	0
135	2	0
136	2	0
139	2	0
140	2	0
142	2	0
151	2	0
155	2	0
160	2	0
162	2	0
163	2	0
164	2	0
166	2	0
167	2	0
169	2	0
170	2	0
172	2	0
173	2	0
175	2	0
176	2	0
178	2	0
179	2	0
180	2	0
187	2	0
188	2	0
189	2	0
190	2	0
192	2	0
193	2	0
195	2	0
196	2	0
197	2	0
202	2	0
203	2	0
204	2	0.01
205	2	0
207	2	0
209	2	0
210	2	0
211	2	0
213	2	0
214	2	0
215	2	0
216	2	0
224	2	0
230	2	0
231	2	0
232	2	0
233	2	0
234	2	0
235	2	0
240	2	0
243	2	0
244	2	0
246	2	0
250	2	0
251	2	0
256	2	0
257	2	0
258	2	0
259	2	0
260	2	0
263	2	0
264	2	0
266	2	0
269	2	0
273	2	0
281	2	0
284	2	0
286	2	0
287	2	0
288	2	0
290	2	0
293	2	0
296	2	0
303	2	0
304	2	0
305	2	0
307	2	0
313	2	0
314	2	0
316	2	0
319	2	0
323	2	0
325	2	0
326	2	0
327	2	0
331	2	0
333	2	0
334	2	0
335	2	0
338	2	0
341	2	0
343	2	0
344	2	0
346	2	0
347	2	0
348	2	0
349	2	0
351	2	0
354	2	0
356	2	0
357	2	0
360	2	0
363	2	0
364	2	0
366	2	0
367	2	0
368	2	0
370	2	0
373	2	0
378	2	0
380	2	0
389	2	0
391	2	0
393	2	0
397	2	0
398	2	0
400	2	0
402	2	0
406	2	0
2	3	0
7	3	0
8	3	0
9	3	0
11	3	0.06
13	3	0
22	3	0.01
28	3	0.01
32	3	0
34	3	0.01
47	3	0
54	3	0
57	3	0
63	3	0.02
66	3	0.09
67	3	0.02
73	3	0
77	3	0
80	3	0.02
91	3	0
92	3	0
93	3	0.03
97	3	0.01
104	3	0
107	3	0
109	3	0
111	3	0.01
119	3	0.01
121	3	0.03
143	3	0
144	3	0
145	3	0
150	3	0.03
153	3	0.02
159	3	0
161	3	0.03
165	3	0.01
171	3	0
174	3	0
183	3	0.03
184	3	0
194	3	0
198	3	0.01
199	3	0.12
200	3	0.03
201	3	0.03
212	3	0
226	3	0
238	3	0.11
239	3	0.01
245	3	0
249	3	0.17
253	3	0
261	3	0
267	3	0
272	3	0
276	3	0
277	3	0
282	3	0
283	3	0.03
285	3	0.02
300	3	0.01
301	3	0
302	3	0.03
306	3	0
308	3	0.12
310	3	0.03
318	3	0
320	3	0.03
330	3	0
337	3	0.11
342	3	0.03
345	3	0
355	3	0.01
359	3	0.02
361	3	0.01
369	3	0.01
371	3	0.01
372	3	0.03
381	3	0.14
382	3	0
383	3	0
384	3	0
385	3	0
395	3	0
396	3	0.01
405	3	0
407	3	0.39
4	4	0
14	4	0
20	4	0
30	4	0
31	4	0
37	4	0
43	4	0
48	4	0
58	4	0
60	4	0
70	4	0
75	4	0
81	4	0
85	4	0
88	4	0
95	4	0
103	4	0.01
113	4	0
114	4	0.02
134	4	0
138	4	0
141	4	0.01
146	4	0
149	4	0
154	4	0.02
158	4	0
191	4	0
220	4	0.21
223	4	0
225	4	0.09
248	4	0.05
255	4	0
262	4	0
271	4	0
280	4	0
291	4	0
353	4	0
358	4	0
375	4	0
388	4	0.08
392	4	0
394	4	0.02
403	4	0.02
404	4	0
3	5	0
6	5	0
45	5	0
90	5	0
99	5	0
108	5	0
116	5	0
148	5	0
152	5	0
157	5	0
185	5	0
208	5	0
236	5	0
241	5	0
254	5	0.05
289	5	0
292	5	0
295	5	0.04
328	5	0.04
340	5	0
399	5	0
29	6	0
35	6	0
36	6	0
133	6	0
147	6	0
227	6	0
268	6	0
294	6	0
299	6	0.02
309	6	0
312	6	0
324	6	0
329	6	0.05
332	6	0.89
352	6	0
362	6	0
374	6	0
379	6	0
386	6	0
390	6	0
19	7	0
96	7	0.03
156	7	0.03
181	7	0
221	7	0
252	7	0
275	7	0
322	7	0
336	7	0
376	7	0
10	8	0.01
65	8	0
117	8	0.01
120	8	0
137	8	0
182	8	0
222	8	0
229	8	0
274	8	0
311	8	0.01
317	8	0
377	8	0
41	9	0
86	9	0
206	9	0
1	10	0
55	10	0
186	10	0
228	10	0.02
242	10	0
297	10	0
110	11	0.01
219	11	0
27	12	0
82	12	0
89	12	0
217	12	0
265	12	0
39	13	0
270	13	0
278	13	0
321	13	0
25	14	0
123	14	0
129	14	0
71	15	0
247	15	0
279	15	0
177	17	0
298	17	0
339	17	0
387	17	0
125	18	0
218	18	0
315	20	0
61	21	0
365	22	0

## Sheet: protein pairs
		HMS	GS2	Pandey	Overlap	Cosine	Significance	Pairs		Functionally Associated Protien Pairs
MON1	SAT4	0	0.339309	0.0540141	0.2105	0.0462	1.43323e-166			HMS	GS2	Pandey	Overlap	Cosine				HMS	Pandey	GS2	Overlap	Cosine
MON1	AAR2	0	0.305678	0.0540141	0.2105	0.0462	3.89711e-61	ADE2	ADE5,7	0.733	0.96	0.872941	1	0.3467			Functionally Non-Associated Protien Pairs	0	0.0540141	0.339309	0.2105	0.1675
MON1	AAT2	0	0.428429	0.0712487	0.2105	0.0517	8.41837e-74	VPH1	VMA10	0.733	0.642365	0.632416	0.6981	0.3884				0	0.0540141	0.305678	0.2105	0.1873
MON1	ABC1	0	0.361327	0.056115	0.2105	0.0591	8.59799e-40	VMA7	VMA10	0.733	0.754722	0.740928	0.6981	0.3997				0	0.0712487	0.428429	0.2105	0.1704
MON1	ABM1	0	0.243773	0.0725358	0.2857	0.0597	3.04518e-94	TFP1	STV1	0.675	0.779365	0.73623	0.9701	0.4117				0	0.056115	0.361327	0.2105	0.2003
MON1	ACE2	0	0.191392	0.0712487	0.2105	0.07		VPH1	VMA13	0.675	0.794643	0.828417	1	0.4166				0	0.0725358	0.243773	0.2857	0.1734
MON1	ACF4	0	0.578297	0.102492	1	0.0711		VMA7	VMA13	0.675	1	1	1	0.4196				0	0.0712487	0.191392	0.2105	0.1451
MON1	ACH1	0	0.458347	0.0712487	0.2667	0.0734		RPS8B	RPS23B	0.667	0.9625	0.613104	1	0.4618				0	0.102492	0.578297	1	0.2294
MON1	ACK1	0	0.203297	0.056115	0.1053	0.0742		RPS20	RPS23A	0.667	0.6375	0.641049	1	0.4781				0	0.0712487	0.458347	0.2667	0.2369
MON1	ACN9	0	0.34536	0.0540141	0.2105	0.0754		RPS23A	RPS13	0.667	0.6375	0.641049	1	0.4781				0	0.056115	0.203297	0.1053	0.0937
MON1	ACO1	0	0.389776	0.0712487	0.3158	0.0778		RPS23A	RPS1B	0.667	0.9625	0.613104	1	0.4954				0	0.0540141	0.34536	0.2105	0.1416
MON1	ACO2	0	0.498498	0.0540141	0.3158	0.0778		RPS23A	RPS20	0.667	0.6375	0.641049	1	0.4954				0	0.0712487	0.389776	0.3158	0.2008
MON1	ACS1	0	0.376044	0.0712487	0.3158	0.0799		RPS23A	RPS6B	0.667	0.554167	0.641049	0.8966	0.4954				0	0.0540141	0.498498	0.3158	0.3158
MON1	ACS2	0	0.378995	0.0712487	0.2105	0.0806		RPS1B	RPS13	0.667	0.639706	0.735397	1	0.4984				0	0.0712487	0.376044	0.3158	0.1987
MON1	ADD37	0	0.364011	0.058386	0.3158	0.0826		CSL4	LRP1	0.656	0.852284	0.862751	0.7931	0.4984				0	0.0712487	0.378995	0.2105	0.1509
MON1	ADD66	0	0.345261	0.0712487	0.3158	0.0852		MTR4	TRF5	0.653	0.86733	0.749085	0.7647	0.4991				0	0.058386	0.364011	0.3158	0.2601
MON1	ADE16	0	0.299677	0.0712487	0.2105	0.0853		DIS3	LRP1	0.65	0.887347	0.914041	0.8182	0.5171				0	0.0712487	0.345261	0.3158	0.2556
MON1	ADE17	0	0.241392	0.0712487	0.2105	0.087		RRP46	CSL4	0.642	0.989418	0.966003	1	0.542				0	0.0712487	0.299677	0.2105	0.1215
MON1	ADE5,7	0	0.256392	0.102492	0.2105	0.0909		CSL4	RRP40	0.642	1	1	1	0.5428				0	0.0712487	0.241392	0.2105	0.1509
MON1	ADH1	0	0.411164	0.0712487	0.3158	0.0937		CSL4	RRP43	0.642	1	1	1	0.5579				0	0.102492	0.256392	0.2105	0.1383
MON1	ADI1	0	0.385836	0.0622586	0.2105	0.0953		CSL4	RRP45	0.642	0.974026	0.865271	1	0.5581				0	0.0712487	0.411164	0.3158	0.1947
MON1	ADK1	0	0.35989	0.0712487	0.2105	0.0984		CSL4	RRP46	0.642	0.989418	0.966003	1	0.5612				0	0.0622586	0.385836	0.2105	0.1489
MON1	ADK2	0	0.358059	0.0540141	0.3333	0.1185		RRP45	CSL4	0.642	0.974026	0.865271	1	0.5612				0	0.0712487	0.35989	0.2105	0.1509
MON1	ADY3	0	0.310103	0.0622586	0.1053	0.1215		SKI6	MTR3	0.64	0.994464	0.910581	0.9848	0.5622				0	0.0540141	0.358059	0.3333	0.2649
MON1	AEP1	0	0.334249	0.0774278	0.2857	0.1237		CSL4	RRP42	0.638	0.950887	0.836355	0.9828	0.5791				0	0.0622586	0.310103	0.1053	0.0754
MON1	AEP2	0	0.393773	0.0591567	0.5	0.1249		SKI7	MTR3	0.633	0.806283	0.756093	0.5893	0.58				0	0.0774278	0.334249	0.2857	0.2453
MON1	AEP3	0	0.345238	0.0996355	0.3077	0.1273		POS5	UTR1	0.633	0.564583	0.874542	0.8293	0.5857				0	0.0591567	0.393773	0.5	0.2294
MON1	AFG1	0	0.440408	0.0540141	0.5263	0.1273		LSM7	DIB1	0.6	0.709926	0.516013	0.6786	0.5869				0	0.0996355	0.345238	0.3077	0.2545
MON1	AFG3	0	0.498481	0.0650665	0.6842	0.1334		SME1	LEA1	0.6	0.805556	0.633153	1	0.588				0	0.0540141	0.440408	0.5263	0.4588
MON1	AFG3	0	0.498481	0.0650665	0.6842	0.135		PRP8	LSM2	0.6	0.585997	0.463222	0.6552	0.6099				0	0.0650665	0.498481	0.6842	0.4903
MON1	AFI1	0	0.291392	0.0540141	0.1538	0.1364		PRP8	LSM5	0.6	0.607149	0.516013	0.6552	0.6182				0	0.0650665	0.498481	0.6842	0.4903
MON1	AFR1	0	0.216961	0.0540141	0.1053	0.1383		PRP8	LSM6	0.6	0.607149	0.516013	0.6552	0.6231				0	0.0540141	0.291392	0.1538	0.1273
MON1	AGA1	0	0.318665	0.0622586	0.2105	0.1383		SMD3	PRP3	0.6	1	1	1	0.6237				0	0.0540141	0.216961	0.1053	0.07
MON1	AHC2	0	0.578297	0.0871468	1	0.1383		SMD3	PRP6	0.6	0.964286	0.755813	1	0.6237				0	0.0622586	0.318665	0.2105	0.1913
MON1	AI3	0	0.351709	0.0650665	0.2105	0.1416		SMD3	PRP8	0.6	0.709722	0.633153	1	0.6304				0	0.0871468	0.578297	1	0.2294
MON1	AI5_ALPHA	0	0.349328	0.0622586	0.2105	0.1416		PRP8	PRP31	0.6	0.951389	0.510098	0.963	0.6347				0	0.0650665	0.351709	0.2105	0.1913
MON1	AI5_BETA	0	0.373932	0.0574215	0.2222	0.1451		PRP21	SMD1	0.6	1	1	1	0.6542				0	0.0622586	0.349328	0.2105	0.1873
MON1	AIF1	0	0.24794	0.0622586	0.1579	0.1489		CEF1	PRP8	0.6	0.4875	0.463222	0.6552	0.6542				0	0.0574215	0.373932	0.2222	0.2163
MON1	AIM1	0	0.578297	0.102492	1	0.1489		PRP45	HSH155	0.6	0.966667	0.672788	0.963	0.6621				0	0.0622586	0.24794	0.1579	0.135
MON1	AIM10	0	0.301282	0.0540141	0.2105	0.1509		RSE1	HSH49	0.6	0.8	0.709966	1	0.6656				0	0.102492	0.578297	1	0.2294
MON1	AIM11	0	0.578297	0.111968	1	0.1509		CWC22	CEF1	0.6	0.777778	0.633153	1	0.6674				0	0.0540141	0.301282	0.2105	0.1574
MON1	AIM13	0	0.578297	0.087053	1	0.1509		SNU56	SMD1	0.6	1	1	1	0.6724				0	0.111968	0.578297	1	0.2294
MON1	AIM14	0	0.578297	0.0622586	1	0.1509		SNU56	SNP1	0.6	1	1	1	0.6818				0	0.087053	0.578297	1	0.2294
MON1	AIM17	0	0.384249	0.0540141	0.25	0.1509		SMD2	PRP6	0.6	0.964286	0.755813	1	0.6828				0	0.0622586	0.578297	1	0.2294
MON1	AIM18	0	0.271392	0.056115	0.3333	0.1529		SMD2	PRP8	0.6	0.709722	0.633153	1	0.6846				0	0.0540141	0.384249	0.25	0.1987
MON1	AIM19	0	0.578297	0.0961624	1	0.1551		SNU66	SPP381	0.6	0.783333	0.755813	1	0.687				0	0.056115	0.271392	0.3333	0.2649
MON1	AIM2	0	0.578297	0.0833918	1	0.1574		PRP40	PRP42	0.6	1	1	1	0.6892				0	0.0961624	0.578297	1	0.2294
MON1	AIM20	0	0.578297	0.0871303	1	0.1622		LSM8	SMB1	0.6	0.889093	0.669363	1	0.6936				0	0.0833918	0.578297	1	0.2294
MON1	AIM21	0	0.391636	0.0540141	0.5	0.1675		LSM8	SMD1	0.6	0.889093	0.669363	1	0.701				0	0.0871303	0.578297	1	0.2294
MON1	AIM23	0	0.578297	0.087053	1	0.1675		LSM8	SMD2	0.6	0.889093	0.669363	1	0.701				0	0.0540141	0.391636	0.5	0.3974
MON1	AIM24	0	0.578297	0.087053	1	0.1704		LSM8	SMD3	0.6	0.889093	0.669363	1	0.7021				0	0.087053	0.578297	1	0.2294
MON1	AIM25	0	0.578297	0.087053	1	0.1704		SNU56	STO1	0.6	0.8283	0.633153	1	0.7071				0	0.087053	0.578297	1	0.2294
MON1	AIM26	0	0.578297	0.0961624	1	0.1734		NAM7	NMD2	0.6	0.748027	0.933073	1	0.7088				0	0.087053	0.578297	1	0.2294
MON1	AIM27	0	0.37321	0.0691917	0.3636	0.1734		PRP31	SNU114	0.6	0.958333	0.510098	0.963	0.7119				0	0.0961624	0.578297	1	0.2294
MON1	AIM29	0	0.578297	0.0981347	1	0.1734		RPR2	POP4	0.6	0.955882	0.983007	1	0.714				0	0.0691917	0.37321	0.3636	0.2767
MON1	AIM3	0	0.578297	0.0642292	1	0.1774		CFT2	PAP1	0.6	0.661565	0.730925	0.625	0.714				0	0.0981347	0.578297	1	0.2294
MON1	AIM32	0	0.578297	0.102492	1	0.1835		HSH49	HSH155	0.6	0.783333	0.849046	1	0.714				0	0.0642292	0.578297	1	0.2294
MON1	AIM33	0	0.43544	0.0830794	0.6667	0.1873		FET3	FTR1	0.567	0.768182	0.958792	1	0.725				0	0.102492	0.578297	1	0.2294
MON1	AIM34	0	0.578297	0.0756408	1	0.1873		CDC48	HRD1	0.567	0.489484	0.599656	0.6765	0.7265				0	0.0830794	0.43544	0.6667	0.2649
MON1	AIM36	0	0.578297	0.087053	1	0.1873		GAL10	GAL7	0.567	0.654762	0.910581	0.84	0.7316				0	0.0756408	0.578297	1	0.2294
MON1	AIM37	0	0.578297	0.0961624	1	0.1873		GCD10	GCD14	0.567	0.787037	0.802345	1	0.7316				0	0.087053	0.578297	1	0.2294
MON1	AIM38	0	0.578297	0.0961624	1	0.1891		PET112	HER2	0.567	0.891121	0.874542	0.9459	0.7379				0	0.0961624	0.578297	1	0.2294
MON1	AIM39	0	0.578297	0.111968	1	0.1913		SRB8	SSN3	0.567	0.675873	0.670171	1	0.7454				0	0.0961624	0.578297	1	0.2294
MON1	AIM4	0	0.578297	0.0981347	1	0.1913		SRB8	SSN8	0.567	0.733333	0.670171	1	0.7518				0	0.111968	0.578297	1	0.2294
MON1	AIM41	0	0.334249	0.0591567	0.2857	0.1913		GCD14	GCD10	0.567	0.787037	0.802345	1	0.7518				0	0.0981347	0.578297	1	0.2294
MON1	AIM43	0	0.578297	0.0961624	1	0.1913		PWP2	DIP2	0.56	0.93006	0.708633	0.9697	0.7518				0	0.0591567	0.334249	0.2857	0.2453
MON1	AIM44	0	0.578297	0.0741301	1	0.1947		POP7	RPP1	0.558	1	1	1	0.7534				0	0.0961624	0.578297	1	0.2294
MON1	AIM46	0	0.271392	0.056115	0.3333	0.1956		POP6	RPP1	0.558	1	1	1	0.7559				0	0.0741301	0.578297	1	0.2294
MON1	AIM5	0	0.578297	0.087053	1	0.1956		POP5	RPP1	0.558	1	1	1	0.7559				0	0.056115	0.271392	0.3333	0.2649
MON1	AIM6	0	0.578297	0.102492	1	0.1956		PFS2	YSH1	0.55	0.932539	0.800328	1	0.7588				0	0.087053	0.578297	1	0.2294
MON1	AIM7	0	0.578297	0.0540141	1	0.1956		FIP1	GLC7	0.55	0.701153	0.73698	0.9688	0.759				0	0.102492	0.578297	1	0.2294
MON1	AIM9	0	0.578297	0.087053	1	0.1956		YSH1	MPE1	0.55	0.932539	0.800328	1	0.7664				0	0.0540141	0.578297	1	0.2294
MON1	AKR1	0	0.381395	0.0953301	0.6316	0.1966		RNA14	FIP1	0.55	0.950893	0.882583	1	0.7868				0	0.087053	0.578297	1	0.2294
MON1	AKR2	0	0.260323	0.0650665	0.3158	0.1987		RPS1B	RPS9B	0.55	0.796875	0.811914	1	0.7909				0	0.0953301	0.381395	0.6316	0.3496
MON1	ALD6	0	0.3528	0.0712487	0.2105	0.1987		RNA15	RNA14	0.55	1	1	1	0.7918				0	0.0650665	0.260323	0.3158	0.287
MON1	ALE1	0	0.309039	0.0622586	0.2353	0.2003		UBP2	RSP5	0.533	0.679033	0.657898	0.9375	0.7958				0	0.0712487	0.3528	0.2105	0.1416
MON1	ALF1	0	0.37321	0.0540141	0.25	0.2003		SWD2	REF2	0.533	0.851786	0.933073	1	0.7958				0	0.0622586	0.309039	0.2353	0.2226
MON1	ALG1	0	0.397274	0.0622586	0.2105	0.2008		ENP2	BFR2	0.533	0.516667	0.431101	0.8095	0.7958				0	0.0540141	0.37321	0.25	0.2294
MON1	ALG11	0	0.399725	0.0622586	0.2105	0.2052		NOP2	RRP1	0.533	0.8125	1	1	0.7958				0	0.0622586	0.397274	0.2105	0.1913
MON1	ALG12	0	0.293905	0.0622586	0.2105	0.2052		VPS20	VPS25	0.533	0.616417	0.701929	0.6341	0.8062				0	0.0622586	0.399725	0.2105	0.1956
MON1	ALG13	0	0.322368	0.0712487	0.2105	0.2052		VPS20	VPS28	0.533	0.710104	0.701929	0.8621	0.8083				0	0.0622586	0.293905	0.2105	0.1509
MON1	ALG14	0	0.213217	0.0622586	0.2222	0.2105		VPS20	VPS36	0.533	0.616281	0.657898	0.6585	0.8094				0	0.0712487	0.322368	0.2105	0.1913
MON1	ALG2	0	0.365634	0.0622586	0.2105	0.2105		SNM1	RPP1	0.517	0.94958	0.968688	1	0.8094				0	0.0622586	0.213217	0.2222	0.1529
MON1	ALG3	0	0.34417	0.0622586	0.2105	0.2105		BUR2	SGV1	0.511	0.832143	0.958792	1	0.8101				0	0.0622586	0.365634	0.2105	0.2105
MON1	ALG5	0	0.333549	0.0622586	0.2222	0.2105		RPS20	RPS14A	0.5	0.797917	0.893274	1	0.8121				0	0.0622586	0.34417	0.2105	0.1956
MON1	ALG6	0	0.362688	0.0622586	0.2105	0.2132		TAF5	SPT15	0.5	0.654289	0.719215	0.7231	0.8165				0	0.0622586	0.333549	0.2222	0.2163
MON1	ALG7	0	0.361327	0.0622586	0.2105	0.2163		RPC11	RET1	0.5	0.75	0.95202	1	0.8238				0	0.0622586	0.362688	0.2105	0.1835
MON1	ALG8	0	0.333549	0.0622586	0.2105	0.2163		RPO26	RPB2	0.5	0.73096	0.345447	0.7586	0.8243				0	0.0622586	0.361327	0.2105	0.2003
MON1	ALG8	0	0.333549	0.0622586	0.2105	0.2226		RPO26	RPB4	0.5	0.678144	0.331212	0.7586	0.8283				0	0.0622586	0.333549	0.2105	0.1956
MON1	ALG9	0	0.309944	0.0622586	0.2105	0.2294		RPO26	RPB7	0.5	0.755284	0.331212	0.7586	0.8298				0	0.0622586	0.333549	0.2105	0.1956
MON1	ALK1	0	0.364606	0.0591567	0.2105	0.2294		RPO26	RPB8	0.5	0.9	0.915779	1	0.8389				0	0.0622586	0.309944	0.2105	0.1489
MON1	ALK2	0	0.369963	0.0574215	0.2105	0.2294		RPO26	RPB9	0.5	0.655077	0.331212	0.7586	0.8389				0	0.0591567	0.364606	0.2105	0.1704
MON1	ALO1	0	0.402503	0.0622586	0.2667	0.2294		MED7	SRB2	0.5	0.73015	0.529236	1	0.8399				0	0.0574215	0.369963	0.2105	0.1675
MON1	ALT2	0	0.43544	0.0540141	0.6667	0.2294		MED7	SRB8	0.5	0.772727	0.833159	1	0.8467				0	0.0622586	0.402503	0.2667	0.2369
MON1	AMD2	0	0.578297	0.0540141	1	0.2294		TAF6	GCN5	0.5	0.573609	0.565293	0.7143	0.8467				0	0.0540141	0.43544	0.6667	0.2649
MON1	AME1	0	0.31666	0.0540141	0.1053	0.2294		RPC11	RPO31	0.5	0.75	0.95202	1	0.851				0	0.0540141	0.578297	1	0.2294
MON1	AMN1	0	0.270856	0.0540141	0.1053	0.2294		MED7	SSN2	0.5	0.632179	0.529236	1	0.866				0	0.0540141	0.31666	0.1053	0.0799
MON1	ANP1	0	0.375215	0.0668296	0.2105	0.2294		NOP14	UTP7	0.5	1	1	1	0.8704				0	0.0540141	0.270856	0.1053	0.0852
MON1	ANS1	0	0.578297	0.063528	1	0.2294		RPC53	RPB5	0.5	0.851128	0.628491	0.9091	0.871				0	0.0668296	0.375215	0.2105	0.2105
MON1	APA1	0	0.365634	0.0540141	0.2105	0.2294		RPC53	RPB8	0.5	0.946742	0.681424	0.9091	0.871				0	0.063528	0.578297	1	0.2294
MON1	APA2	0	0.358059	0.0540141	0.3333	0.2294		TRA1	TAF6	0.5	0.78044	0.588587	0.8065	0.871				0	0.0540141	0.365634	0.2105	0.2105
MON1	APD1	0	0.578297	0.0871468	1	0.2294		RPB5	RPB2	0.5	0.73096	0.345447	0.7586	0.8771				0	0.0540141	0.358059	0.3333	0.2649
MON2	PIN2	0	0.543124	0.111968	1	0.2294		RPB5	RPB4	0.5	0.678144	0.331212	0.7586	0.8771				0	0.0871468	0.578297	1	0.2294
MON2	PIS1	0	0.266409	0.0622586	0.0909	0.2294		RPB5	RPB7	0.5	0.755284	0.331212	0.7586	0.8906				0	0.111968	0.543124	1	0.2132
MON2	PKR1	0	0.214841	0.0622586	0.2308	0.2294		RPB5	RPB8	0.5	0.9	0.915779	1	0.905				0	0.0622586	0.266409	0.0909	0.0909
MON2	PMP1	0	0.429371	0.0622586	0.5	0.2294		RPB5	RPB9	0.5	0.655077	0.331212	0.7586	0.9089				0	0.0622586	0.214841	0.2308	0.1774
MON2	PKP2	0.042	0.196112	0.0552212	0.0909	0.2294		TAF8	TAF14	0.5	0.466178	0.750127	0.9	0.9091				0	0.0622586	0.429371	0.5	0.2611
MON1	ADY2	0.044	0.409544	0.0925022	0.2105	0.2294		GCD2	GCD1	0.5	1	1	1	0.9094				0.042	0.0552212	0.196112	0.0909	0.0853
MON2	PIG1	0.044	0.102647	0.0552212	0.0909	0.2294		GCD2	GCD6	0.5	1	1	1	0.9098				0.044	0.0925022	0.409544	0.2105	0.2105
MON2	PIK1	0.044	0.142871	0.0552212	0.0909	0.2294		GCD2	GCD7	0.5	1	1	1	0.922				0.044	0.0552212	0.102647	0.0909	0.0591
MON2	PIM1	0.044	0.205445	0.0552212	0.1364	0.2294		GCD2	GCN2	0.5	0.670018	0.828417	1	0.9283				0.044	0.0552212	0.142871	0.0909	0.0778
MON2	PIN4	0.044	0.229677	0.0552212	0.0909	0.2294		GCD2	GCN3	0.5	1	1	1	0.9284				0.044	0.0552212	0.205445	0.1364	0.1364
MON2	PKH3	0.044	0.145221	0.0587877	0.0909	0.2294		RPB4	RGR1	0.5	0.201283	0.360961	0.5238	0.9292				0.044	0.0552212	0.229677	0.0909	0.087
MON2	PIF1	0.048	0.20217	0.0622172	0.1364	0.2294		MED6	SRB2	0.5	0.651909	0.438308	0.9744	0.9292				0.044	0.0587877	0.145221	0.0909	0.0778
MON2	PIH1	0.048	0.200613	0.0552212	0.0909	0.2294		TAF5	GCN5	0.5	0.471525	0.588587	0.8	0.9305				0.048	0.0622172	0.20217	0.1364	0.0734
MON2	PIN3	0.048	0.274563	0.0622172	0.1364	0.2294		TAF9	SPT15	0.5	0.706021	0.719215	0.7121	0.9309				0.048	0.0552212	0.200613	0.0909	0.0806
MON2	PIP2	0.048	0.19144	0.0622172	0.1364	0.2294		NUT2	SIN4	0.5	0.619048	0.467855	1	0.9399				0.048	0.0622172	0.274563	0.1364	0.1334
MON2	PIR3	0.048	0.237063	0.0650348	0.1765	0.2294		TAF1	TAF6	0.5	0.70558	0.750127	0.98	0.9512				0.048	0.0622172	0.19144	0.1364	0.0826
MON2	PMD1	0.048	0.212063	0.0552212	0.1	0.2294		SRB8	SRB6	0.5	0.772727	0.833159	1	0.9512				0.048	0.0650348	0.237063	0.1765	0.1551
MON1	SUN4	0.051	0.342106	0.0552212	0.1333	0.2294		RPB4	RPB2	0.5	0.556008	0.331212	0.5128	0.952				0.048	0.0552212	0.212063	0.1	0.0953
MON1	ABF2	0.051	0.254884	0.0552212	0.3333	0.2294		RPB4	RPB3	0.5	0.638361	0.331212	0.6757	0.952				0.051	0.0552212	0.342106	0.1333	0.1185
MON1	ABP140	0.051	0.243773	0.0552212	0.2857	0.2294		RPB4	RPB5	0.5	0.678144	0.331212	0.7586	0.9535				0.051	0.0552212	0.254884	0.3333	0.1873
MON1	ABP140	0.051	0.243773	0.0552212	0.2857	0.2369		RPB4	RPB8	0.5	0.773758	0.357865	0.9091	0.9555				0.051	0.0552212	0.243773	0.2857	0.1734
MON1	ADH7	0.051	0.393773	0.0562903	0.4	0.2369		RPC19	RPB10	0.5	0.868421	0.888179	1	0.9555				0.051	0.0552212	0.243773	0.2857	0.1734
MON1	ADY4	0.051	0.39169	0.0587877	0.1538	0.2396		SRB7	SIN4	0.5	0.0512531	0.479589	1	0.963				0.051	0.0562903	0.393773	0.4	0.2052
MON1	AFG2	0.051	0.268773	0.0552212	0.25	0.2453		RPC19	RPC25	0.5	0.95743	0.823411	0.9524	0.9672				0.051	0.0587877	0.39169	0.1538	0.1273
MON2	PIG2	0.051	0.161698	0.0552212	0.0909	0.2453		RPC19	RPC40	0.5	0.866667	0.888179	1	0.9672				0.051	0.0552212	0.268773	0.25	0.1622
MON2	PKH2	0.051	0.168909	0.0552212	0.0909	0.2545		RPC19	RPC53	0.5	0.951128	0.71473	0.9524	0.9775				0.051	0.0552212	0.161698	0.0909	0.0517
MON2	PMI40	0.051	0.14215	0.0552212	0.0909	0.2556		GCD1	GCD2	0.5	1	1	1	1				0.051	0.0552212	0.168909	0.0909	0.0742
MON2	PIB2	0.056	0.481643	0.103225	0.5	0.2601		GCD1	GCD6	0.5	1	1	1	1				0.051	0.0552212	0.14215	0.0909	0.0597
MON2	PKP1	0.056	0.196112	0.0552212	0.0909	0.2611		GCD1	GCD7	0.5	1	1	1	1				0.056	0.103225	0.481643	0.5	0.3371
MON2	PLP1	0.056	0.137457	0.057419	0.0909	0.2649		GCD1	GCN3	0.5	1	1	1	1				0.056	0.0552212	0.196112	0.0909	0.0711
MON2	PLP2	0.056	0.137457	0.0552212	0.0909	0.2649		RPB3	RGR1	0.5	0.210243	0.377934	0.5946	1				0.056	0.057419	0.137457	0.0909	0.0462
MON1	ABZ1	0.061	0.298719	0.0562903	0.2105	0.2649		SRB2	CSE2	0.5	0.544626	0.359837	0.7547	1				0.056	0.0552212	0.137457	0.0909	0.0462
MON1	ABZ2	0.061	0.237904	0.0562903	0.2105	0.2649		RPC10	RPB2	0.5	0.747162	0.374541	0.9091	1				0.061	0.0562903	0.298719	0.2105	0.1249
MON1	ADE3	0.061	0.326992	0.0562903	0.2105	0.2649		RPC10	RPB3	0.5	0.829515	0.374541	0.9091	1				0.061	0.0562903	0.237904	0.2105	0.1383
MON1	ADE4	0.061	0.298758	0.0562903	0.2105	0.2649		RPC10	RPB5	0.5	0.9	0.915779	1	1				0.061	0.0562903	0.326992	0.2105	0.0984
MON1	ADH2	0.061	0.426664	0.0585758	0.3158	0.2767		RPC10	RPB7	0.5	0.793085	0.357865	0.9091	1				0.061	0.0562903	0.298758	0.2105	0.1237
MON1	ADH3	0.061	0.433369	0.0562903	0.3158	0.287		RPC10	RPB8	0.5	1	1	1	1				0.061	0.0585758	0.426664	0.3158	0.1891
MON1	ADH5	0.061	0.437775	0.0562903	0.3158	0.2935		RPC10	RPB9	0.5	0.750691	0.357865	0.9091	1				0.061	0.0562903	0.433369	0.3158	0.2052
MON1	AGX1	0.061	0.277106	0.0562903	0.2105	0.3158		SRB5	RPO21	0.5	0.209609	0.386279	0.7609	1				0.061	0.0562903	0.437775	0.3158	0.1873
MON1	ALD3	0.061	0.419892	0.0562903	0.3158	0.3244		NUT1	SIN4	0.5	0.619048	0.467855	1	1				0.061	0.0562903	0.277106	0.2105	0.1509
MON1	ALD4	0.061	0.356454	0.0562903	0.2105	0.3371		SRB7	SRB2	0.5	0.251763	0.479589	1	1				0.061	0.0562903	0.419892	0.3158	0.1966
MON1	ALD5	0.061	0.428255	0.0562903	0.2105	0.3496		RPB3	RPB2	0.5	0.707843	0.345447	0.5946	1				0.061	0.0562903	0.356454	0.2105	0.1383
MON1	AOS1	0.061	0.334249	0.0562903	0.2105	0.3974		RPB3	RPB4	0.5	0.638361	0.331212	0.6757	1				0.061	0.0562903	0.428255	0.2105	0.1956
MON1	AAC1	0.067	0.536166	0.0716335	0.4211	0.4104		RPB3	RPB7	0.5	0.732167	0.331212	0.6486	1				0.061	0.0562903	0.334249	0.2105	0.2052
MON1	AAC3	0.067	0.441853	0.068245	0.3158	0.4588		RPB3	RPB8	0.5	0.829515	0.374541	0.9091	1				0.067	0.0716335	0.536166	0.4211	0.3244
MON1	ADP1	0.067	0.569414	0.0716335	0.8	0.4903		RPB3	RPB9	0.5	0.615294	0.331212	0.6486	1				0.067	0.068245	0.441853	0.3158	0.2396
MON1	AGC1	0.067	0.42616	0.068245	0.3158	0.4903		POL30	POL3	0.493	0.802044	0.84169	0.8	1				0.067	0.0716335	0.569414	0.8	0.4104
	Mean	0.0156242	0.379371	0.067893	0.412941	0.195391		TAF1	TAF9	0.492	0.734069	0.95509	1	1				0.067	0.068245	0.42616	0.3158	0.2935
	STD	0.0248476	0.132499	0.015577	0.33105	0.0791045		PFS2	YTH1	0.489	1	1	1	1			Functionally Associated	0.733	0.872941	0.96	1	0.9535
	Median	0	0.364011	0.0622586	0.25	0.1987			Mean	0.557007	0.783659	0.711027	0.90631	0.775026				0.733	0.632416	0.642365	0.6981	0.5869
	MAX	0.067	0.578297	0.111968	1	0.4903			STD	0.0632784	0.184599	0.225222	0.134348	0.172678				0.733	0.740928	0.754722	0.6981	0.6304
	MIN	0	0.102647	0.0540141	0.0909	0.0462			Median	0.533	0.787037	0.733161	1	0.7958				0.675	0.73623	0.779365	0.9701	0.905
	COUNT	0	15	0	150	9			MAX	0.733	1	1	1	1				0.675	0.828417	0.794643	1	0.9309
									MIN	0.489	0.0512531	0.331212	0.5128	0.3467				0.675	1	1	1	1
									COUNT									0.667	0.613104	0.9625	1	0.9555
																		0.667	0.641049	0.6375	1	0.7518
																		0.667	0.641049	0.6375	1	0.7518
																		0.667	0.613104	0.9625	1	0.9555
																		0.667	0.641049	0.6375	1	0.7518
																		0.667	0.641049	0.554167	0.8966	0.7119
																		0.667	0.735397	0.639706	1	0.7868
																		0.656	0.862751	0.852284	0.7931	0.7379
																		0.653	0.749085	0.86733	0.7647	0.714
																		0.65	0.914041	0.887347	0.8182	0.8121
																		0.642	0.966003	0.989418	1	0.9672
																		0.642	1	1	1	1
																		0.642	1	1	1	1
																		0.642	0.865271	0.974026	1	0.952
																		0.642	0.966003	0.989418	1	0.9672
									Functionally associated pairs			Non-functional pairs			Overlap(%)	Significance		0.642	0.865271	0.974026	1	0.952
									Mean	STD	Median	Mean	STD	Median		1.43323e-166		0.64	0.910581	0.994464	0.9848	0.9775
							HMS		0.557007	0.0632784	0.533	0.0156242	0.0248476	0	0	3.89711e-61		0.638	0.836355	0.950887	0.9828	0.9283
							GS-2		0.783659	0.184599	0.787037	0.379371	0.132499	0.364011	63.2107	8.41837e-74		0.633	0.756093	0.806283	0.5893	0.5428
							Pandey		0.711027	0.225222	0.733161	0.067893	0.015577	0.0622586	0	6.53186e-29		0.633	0.874542	0.564583	0.8293	0.7664
							Overlap Score		0.90631	0.134348	1	0.412941	0.33105	0.25	54.8495	8.59799e-40		0.6	0.516013	0.709926	0.6786	0.6347
							Cosine		0.775026	0.172678	0.7958	0.195391	0.0791045	0.1987	6	3.04518e-94		0.6	0.633153	0.805556	1	0.9089
																		0.6	0.463222	0.585997	0.6552	0.58
																		0.6	0.516013	0.607149	0.6552	0.6237
																		0.6	0.516013	0.607149	0.6552	0.6237
																		0.6	1	1	1	1
																		0.6	0.755813	0.964286	1	0.9512
																		0.6	0.633153	0.709722	1	0.8094
																		0.6	0.510098	0.951389	0.963	0.9292
																		0.6	1	1	1	1
																		0.6	0.463222	0.4875	0.6552	0.5579
																		0.6	0.672788	0.966667	0.963	0.963
																		0.6	0.709966	0.8	1	0.8238
																		0.6	0.633153	0.777778	1	0.6892
																		0.6	1	1	1	1
																		0.6	1	1	1	1
																		0.6	0.755813	0.964286	1	0.9512
																		0.6	0.633153	0.709722	1	0.8094
																		0.6	0.755813	0.783333	1	0.8389
																		0.6	1	1	1	1
																		0.6	0.669363	0.889093	1	0.7958
																		0.6	0.669363	0.889093	1	0.7958
																		0.6	0.669363	0.889093	1	0.7958
																		0.6	0.669363	0.889093	1	0.7958
																		0.6	0.633153	0.8283	1	0.7265
																		0.6	0.933073	0.748027	1	0.6674
																		0.6	0.510098	0.958333	0.963	0.9292
																		0.6	0.983007	0.955882	1	0.8906
																		0.6	0.730925	0.661565	0.625	0.6099
																		0.6	0.849046	0.783333	1	0.8389
																		0.567	0.958792	0.768182	1	0.8165
																		0.567	0.599656	0.489484	0.6765	0.588
																		0.567	0.910581	0.654762	0.84	0.8083
																		0.567	0.802345	0.787037	1	0.714
																		0.567	0.874542	0.891121	0.9459	0.9098
																		0.567	0.670171	0.675873	1	0.8243
																		0.567	0.670171	0.733333	1	0.9399
																		0.567	0.802345	0.787037	1	0.714
																		0.56	0.708633	0.93006	0.9697	0.9284
																		0.558	1	1	1	1
																		0.558	1	1	1	1
																		0.558	1	1	1	1
																		0.55	0.800328	0.932539	1	0.8771
																		0.55	0.73698	0.701153	0.9688	0.3997
																		0.55	0.800328	0.932539	1	0.8771
																		0.55	0.882583	0.950893	1	0.8101
																		0.55	0.811914	0.796875	1	0.8298
																		0.55	1	1	1	1
																		0.533	0.657898	0.679033	0.9375	0.3467
																		0.533	0.933073	0.851786	1	0.7454
																		0.533	0.431101	0.516667	0.8095	0.7909
																		0.533	1	0.8125	1	0.922
																		0.533	0.701929	0.616417	0.6341	0.4166
																		0.533	0.701929	0.710104	0.8621	0.725
																		0.533	0.657898	0.616281	0.6585	0.4196
																		0.517	0.968688	0.94958	1	0.851
																		0.511	0.958792	0.832143	1	0.9094
																		0.5	0.893274	0.797917	1	0.8062
																		0.5	0.719215	0.654289	0.7231	0.687
																		0.5	0.95202	0.75	1	0.7559
																		0.5	0.345447	0.73096	0.7586	0.6542
																		0.5	0.331212	0.678144	0.7586	0.4954
																		0.5	0.331212	0.755284	0.7586	0.4781
																		0.5	0.915779	0.9	1	0.871
																		0.5	0.331212	0.655077	0.7586	0.5612
																		0.5	0.529236	0.73015	1	0.6936
																		0.5	0.833159	0.772727	1	0.8467
																		0.5	0.565293	0.573609	0.7143	0.6231
																		0.5	0.95202	0.75	1	0.7559
																		0.5	0.529236	0.632179	1	0.7588
																		0.5	1	1	1	1
																		0.5	0.628491	0.851128	0.9091	0.7918
																		0.5	0.681424	0.946742	0.9091	0.9091
																		0.5	0.588587	0.78044	0.8065	0.759
																		0.5	0.345447	0.73096	0.7586	0.6542
																		0.5	0.331212	0.678144	0.7586	0.4954
																		0.5	0.331212	0.755284	0.7586	0.4781
																		0.5	0.915779	0.9	1	0.871
																		0.5	0.331212	0.655077	0.7586	0.5612
																		0.5	0.750127	0.466178	0.9	0.7071
																		0.5	1	1	1	1
																		0.5	1	1	1	1
																		0.5	1	1	1	1
																		0.5	0.828417	0.670018	1	0.6621
																		0.5	1	1	1	1
																		0.5	0.360961	0.201283	0.5238	0.4117
																		0.5	0.438308	0.651909	0.9744	0.6846
																		0.5	0.588587	0.471525	0.8	0.6724
																		0.5	0.719215	0.706021	0.7121	0.6818
																		0.5	0.467855	0.619048	1	0.7316
																		0.5	0.750127	0.70558	0.98	0.8283
																		0.5	0.833159	0.772727	1	0.8467
																		0.5	0.331212	0.556008	0.5128	0.3884
																		0.5	0.331212	0.638361	0.6757	0.4984
																		0.5	0.331212	0.678144	0.7586	0.4954
																		0.5	0.357865	0.773758	0.9091	0.5171
																		0.5	0.888179	0.868421	1	0.7534
																		0.5	0.479589	0.0512531	1	0.7021
																		0.5	0.823411	0.95743	0.9524	0.8399
																		0.5	0.888179	0.866667	1	0.866
																		0.5	0.71473	0.951128	0.9524	0.9305
																		0.5	1	1	1	1
																		0.5	1	1	1	1
																		0.5	1	1	1	1
																		0.5	1	1	1	1
																		0.5	0.377934	0.210243	0.5946	0.5581
																		0.5	0.359837	0.544626	0.7547	0.6182
																		0.5	0.374541	0.747162	0.9091	0.6828
																		0.5	0.374541	0.829515	0.9091	0.701
																		0.5	0.915779	0.9	1	0.871
																		0.5	0.357865	0.793085	0.9091	0.4991
																		0.5	1	1	1	1
																		0.5	0.357865	0.750691	0.9091	0.5857
																		0.5	0.386279	0.209609	0.7609	0.7088
																		0.5	0.467855	0.619048	1	0.7316
																		0.5	0.479589	0.251763	1	0.6656
																		0.5	0.345447	0.707843	0.5946	0.5791
																		0.5	0.331212	0.638361	0.6757	0.4984
																		0.5	0.331212	0.732167	0.6486	0.4618
																		0.5	0.374541	0.829515	0.9091	0.701
																		0.5	0.331212	0.615294	0.6486	0.542
																		0.493	0.84169	0.802044	0.8	0.5622
																		0.492	0.95509	0.734069	1	0.8704
																		0.489	1	1	1	1
																		1
																	Overlap	0	0	164	189	15
																		0	0	54.8495	63.2107	0.06
																		0	0	54.8495	63.2107	0.06

## Sheet: Gene-Pathway
	Propanoate metabolism	Valine, leucine and isoleucine degradation	Cyanoamino acid metabolism	Methane Metabolism	beta-Alanine degradation	Synthesis and degradation of ketone bodies	Lysine degradation	Biosynthesis of unsaturated fatty acids Nucleotide Metabolism	Fatty acid metabolism
ALD4	1	1	0	0	1	0	1	0	1
ALD5	1	1	0	0	1	0	1	0	1
ALD6	1	1	0	0	1	0	1	0	1
ERG10	1	1	0	0	0	1	1	0	0
ERG13	0	1	0	0	0	1	0	0	0
SHM1	0	0	1	1	0	0	0	0	0
SHM2	0	0	1	1	0	0	0	0	0
UGA1	0	1	0	0	1	0	0	0	0
POX1	0	0	0	0	0	0	0	1	1
